# Supplementary material for: Activity, social and sexual behaviour in Red Junglefowl selected for divergent levels of fear of humans
Source: PLoS One. 2018 Sep 26;13(9):e0204303. doi: 10.1371/journal.pone.0204303 (PMC6157887; doi:10.1371/journal.pone.0204303)
Supplement: S2 Table — The complete data set used for the statistical analysis. (XLSX) [file pone.0204303.s002.xlsx]

## Sheet: Sheet1
group	line	sex	explore (%)	feather_preening (%)	activity (%)	vocalisation (%)	agonistic (%)
1	high	female	54.6	5.65	24.8	10.4	0
1	high	male	28.95	12.3	22.9	7.3	0.2
2	low	female	56.65	10.2	29.8	21.5	0.2
2	low	male	38.15	10.25	36.05	27.3	0.4
3	high	female	45.6	10.6	27.95	15.8	0
3	high	male	23.35	33.35	18.35	20.2	1.9
4	low	female	56.5	11.85	51.5	39.4	0.2
4	low	male	44.8	11.25	47.1	37.1	0.7
5	low	female	46.65	22.95	24.2	36.7	0
5	low	male	34.35	8.15	35.45	35.2	7.1
6	high	female	18.55	15.85	11.45	18.1	0
6	high	male	20.85	34	11.45	19	0.9
